# Supplementary material for: Combination of radiation therapy, bempegaldesleukin, and checkpoint blockade eradicates advanced solid tumors and metastases in mice
Source: PubMed Central journal article supplement — J Immunother Cancer. 2021 Jun 25;9(6):e002715. doi: 10.1136/jitc-2021-002715 (PMC8237721; doi:10.1136/jitc-2021-002715), 2021-06-25

## Supplemental Figures

## Figure S1a: Individual Mouse Curves in B78 Model

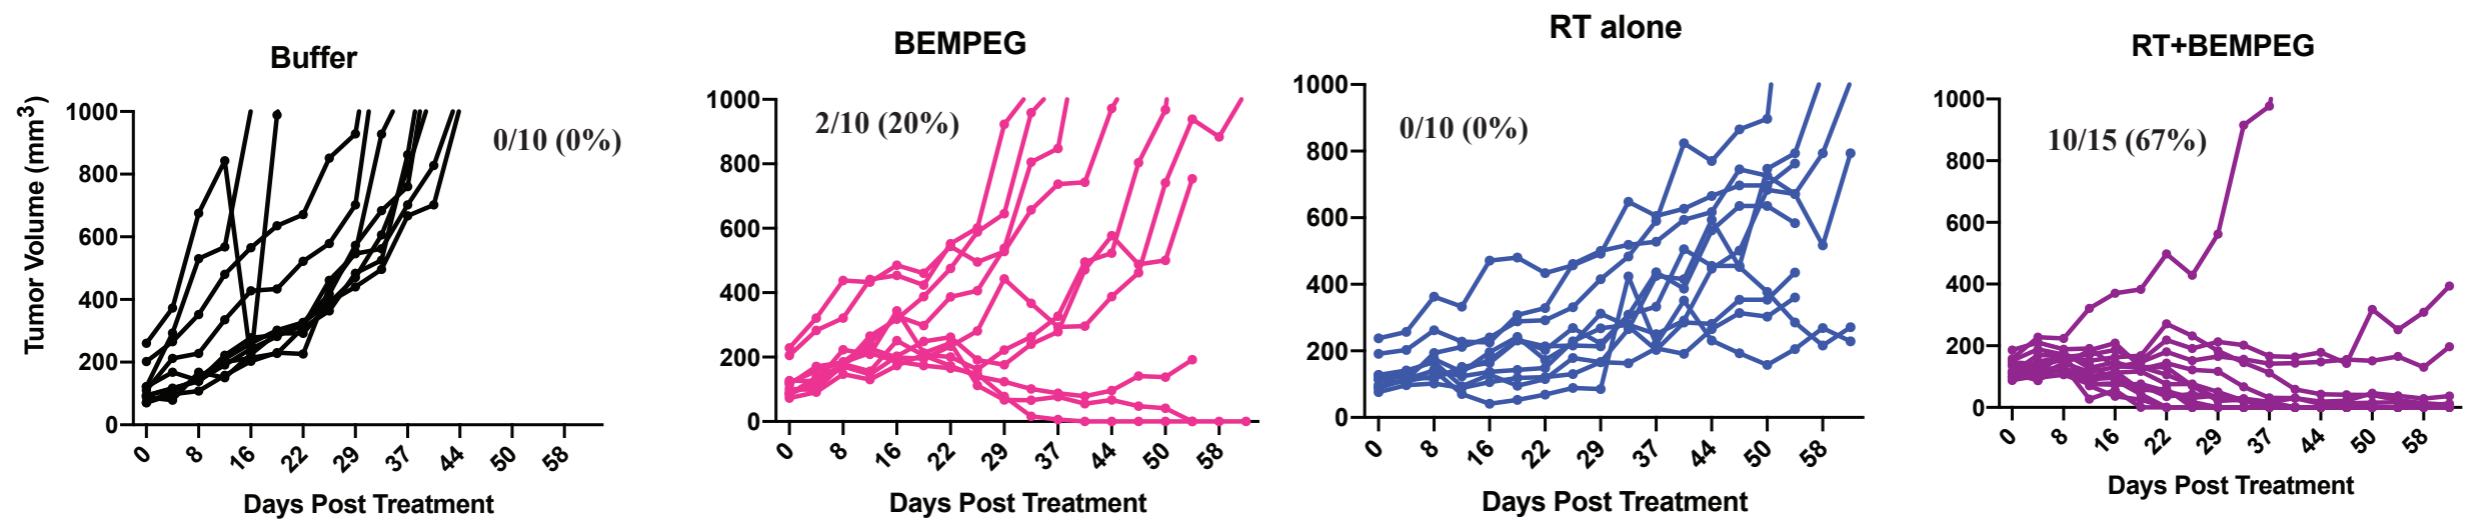

## Figure S1b: Percent of mice rejecting B78 re-challenge

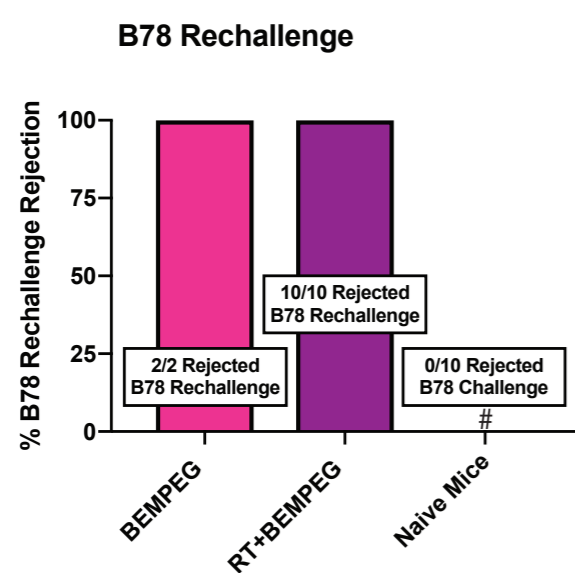

## Figure S1c: Individual Mouse Curves in 4T1 Model

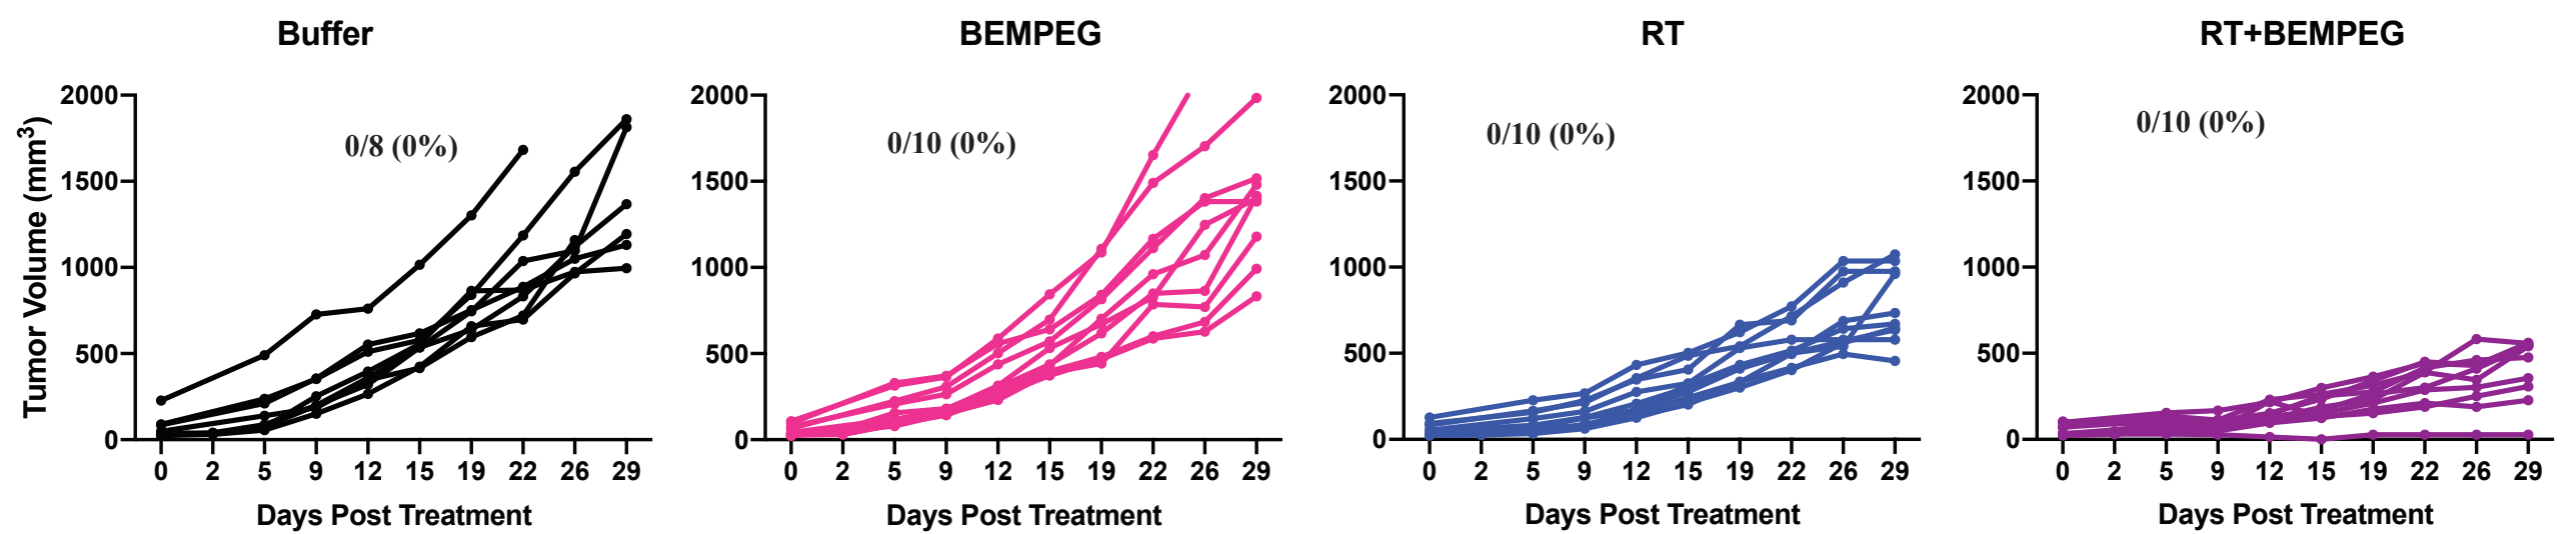

## Figure S1d: Individual Mouse Curves in MOC2 Model

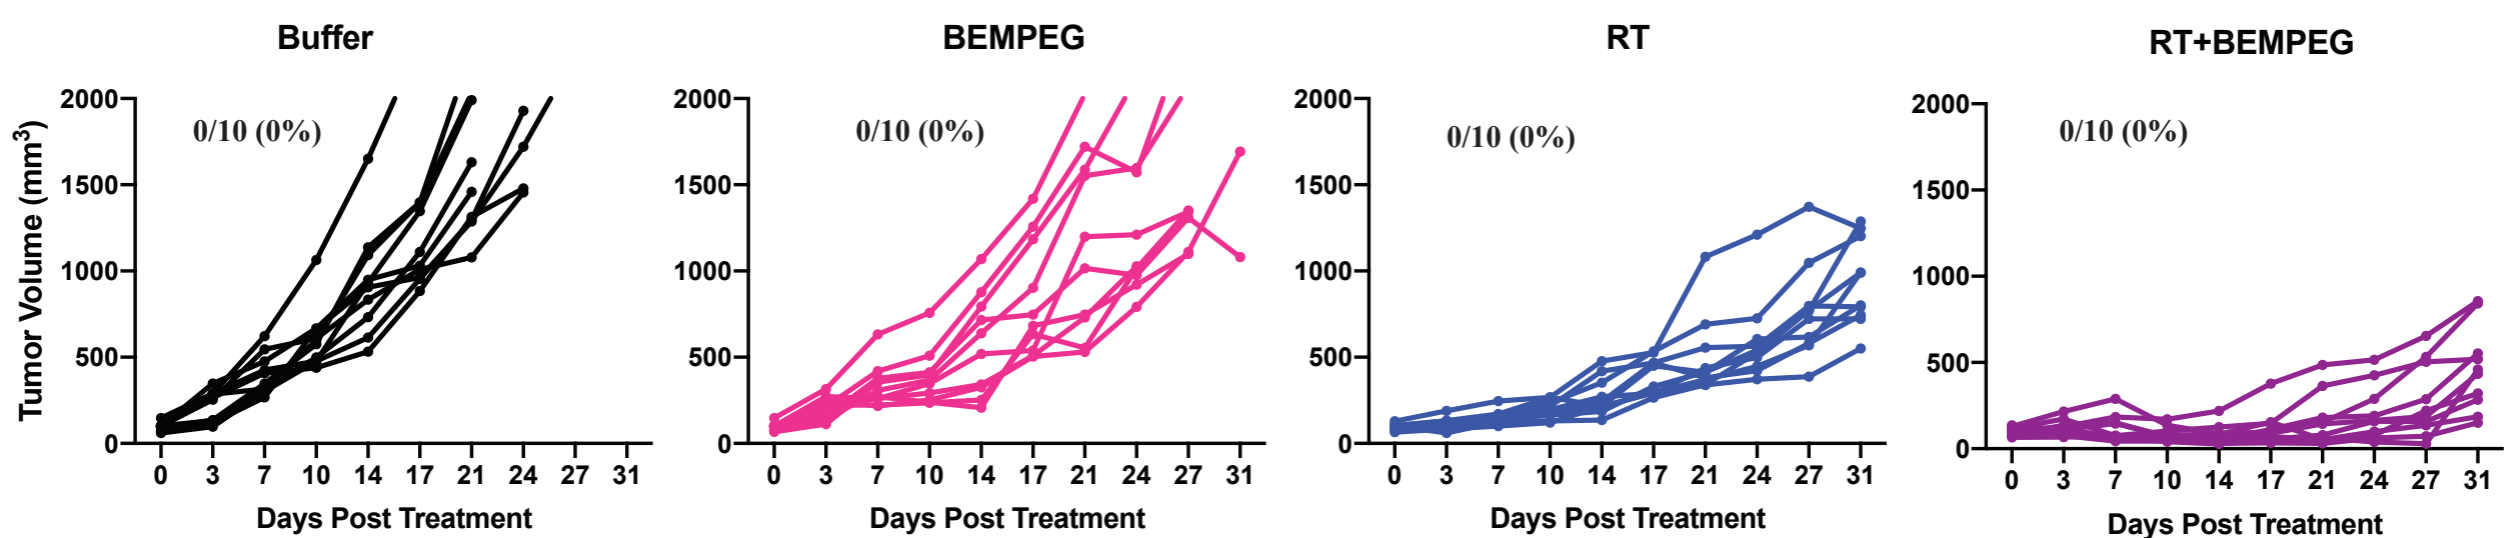

Supplement: jitc-2021-002715supp001.pdf [file jitc-2021-002715supp001.pdf]
