# Supplementary material for: Combination of radiation therapy, bempegaldesleukin, and checkpoint blockade eradicates advanced solid tumors and metastases in mice
Source: PubMed Central journal article supplement — J Immunother Cancer. 2021 Jun 25;9(6):e002715. doi: 10.1136/jitc-2021-002715 (PMC8237721; doi:10.1136/jitc-2021-002715), 2021-06-25

## Figure S7a: RT+BEMPEG Demonstrates Superior Tumor Control Over RT+IT IL2

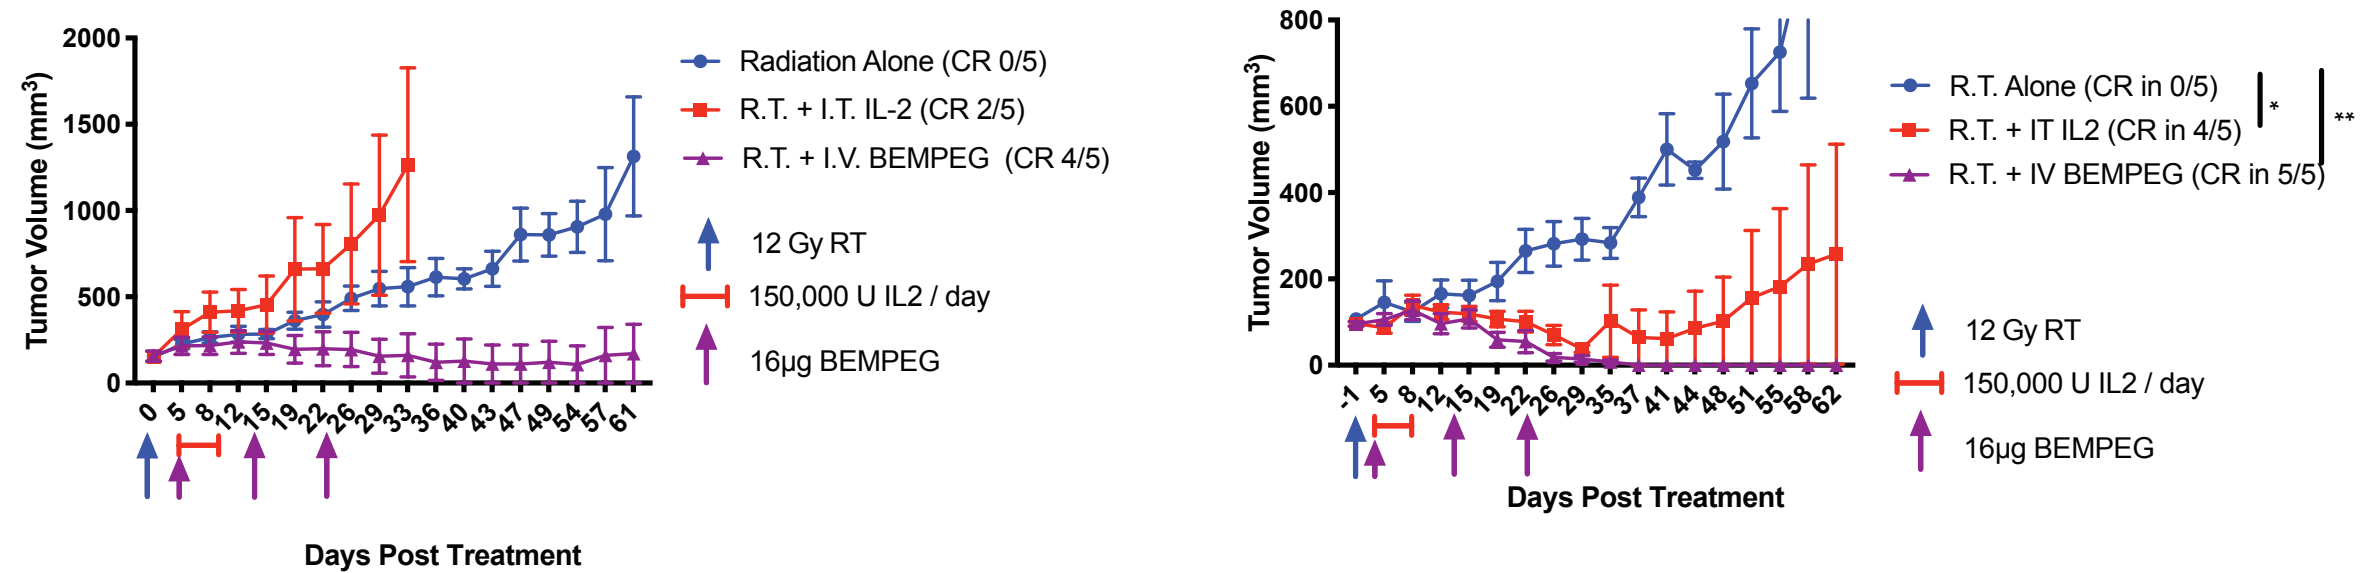

## Figure S7b: Individual Mouse Curves of RT+BEMPEG and RT+IL2 in B78 Model

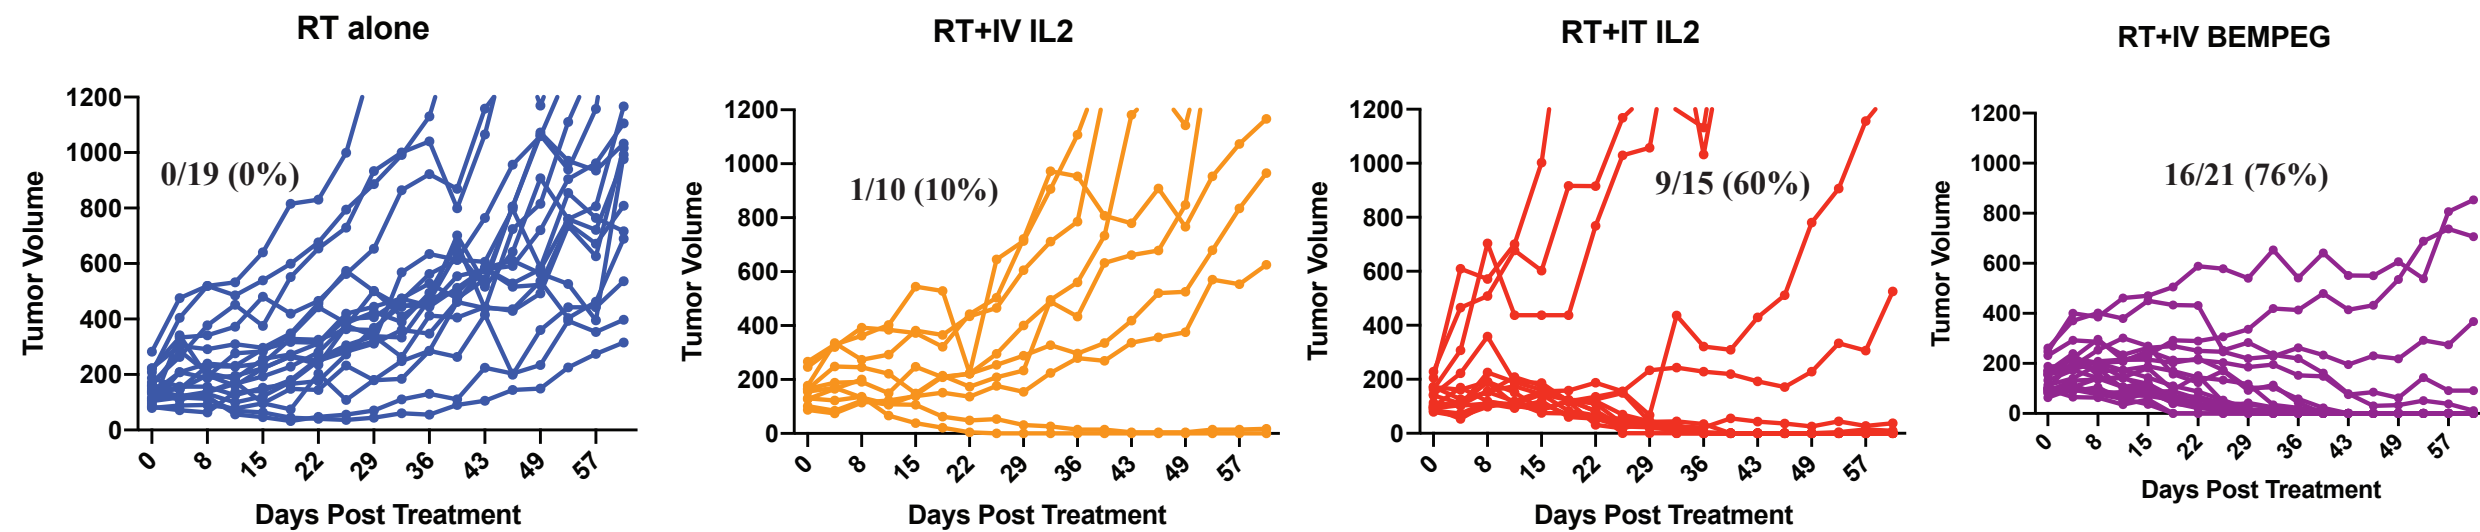

Supplement: jitc-2021-002715supp007.pdf [file jitc-2021-002715supp007.pdf]
