# Supplementary material for: Combination of radiation therapy, bempegaldesleukin, and checkpoint blockade eradicates advanced solid tumors and metastases in mice
Source: PubMed Central journal article supplement — J Immunother Cancer. 2021 Jun 25;9(6):e002715. doi: 10.1136/jitc-2021-002715 (PMC8237721; doi:10.1136/jitc-2021-002715), 2021-06-25

**Figure S13: Anti-tumor effect of RT+BEMPEG+anti-CTLA-4 in B78 Primary B16 Metastasis Model is T cell Mediated****A**

Buffer

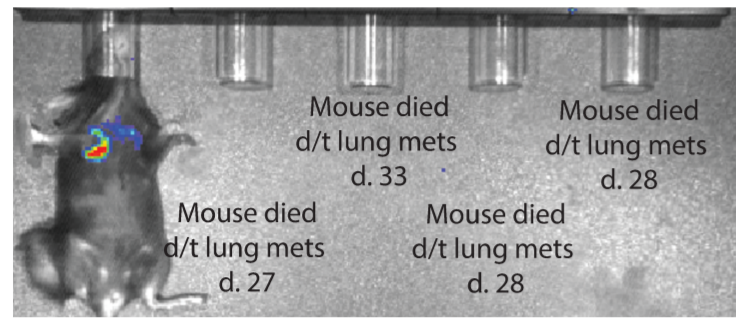

RT+anti-CTLA-4

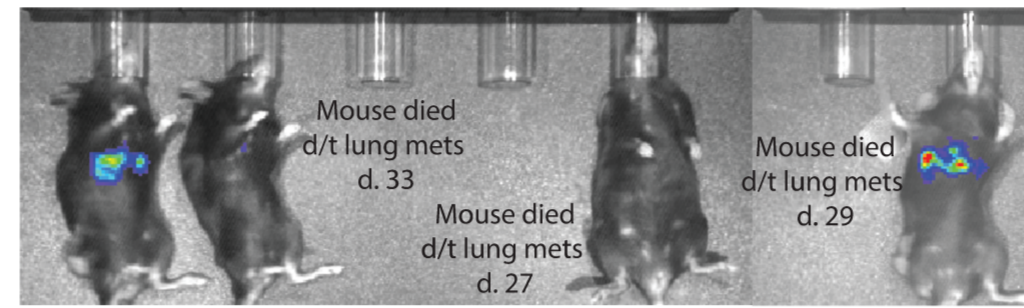

BEMPEG+anti-CTLA-4

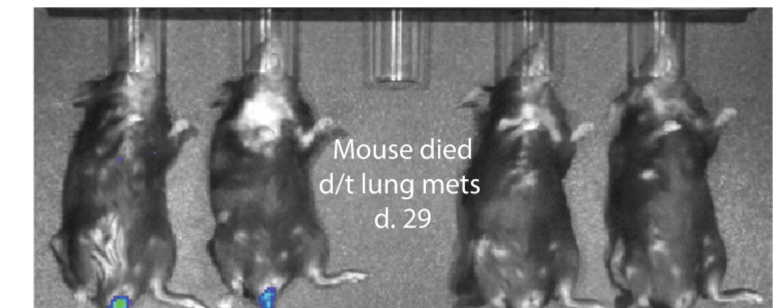

RT+BEMPEG+anti-CTLA-4+T cell Depletion

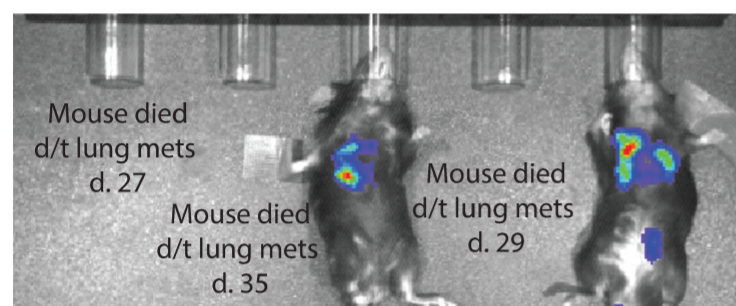

RT+BEMPEG+anti-CTLA-4

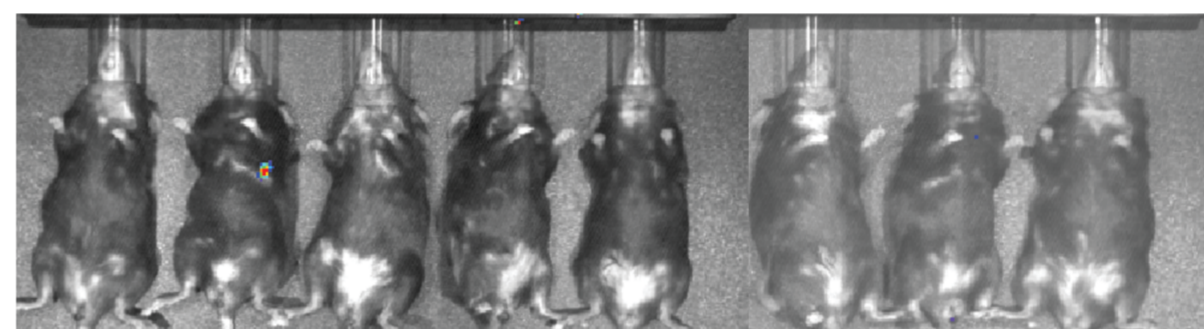

Supplement: jitc-2021-002715supp013.pdf [file jitc-2021-002715supp013.pdf]
