# Supplementary figures and images for: Combination of radiation therapy, bempegaldesleukin, and checkpoint blockade eradicates advanced solid tumors and metastases in mice
Source: HighWire-hosted journal article supplement (doi:10.1136/jitc-2021-002715), 2021-06-01

## Figure S3: Gating Strategy Used to Analyze Tumor Immune Cell Infiltrate

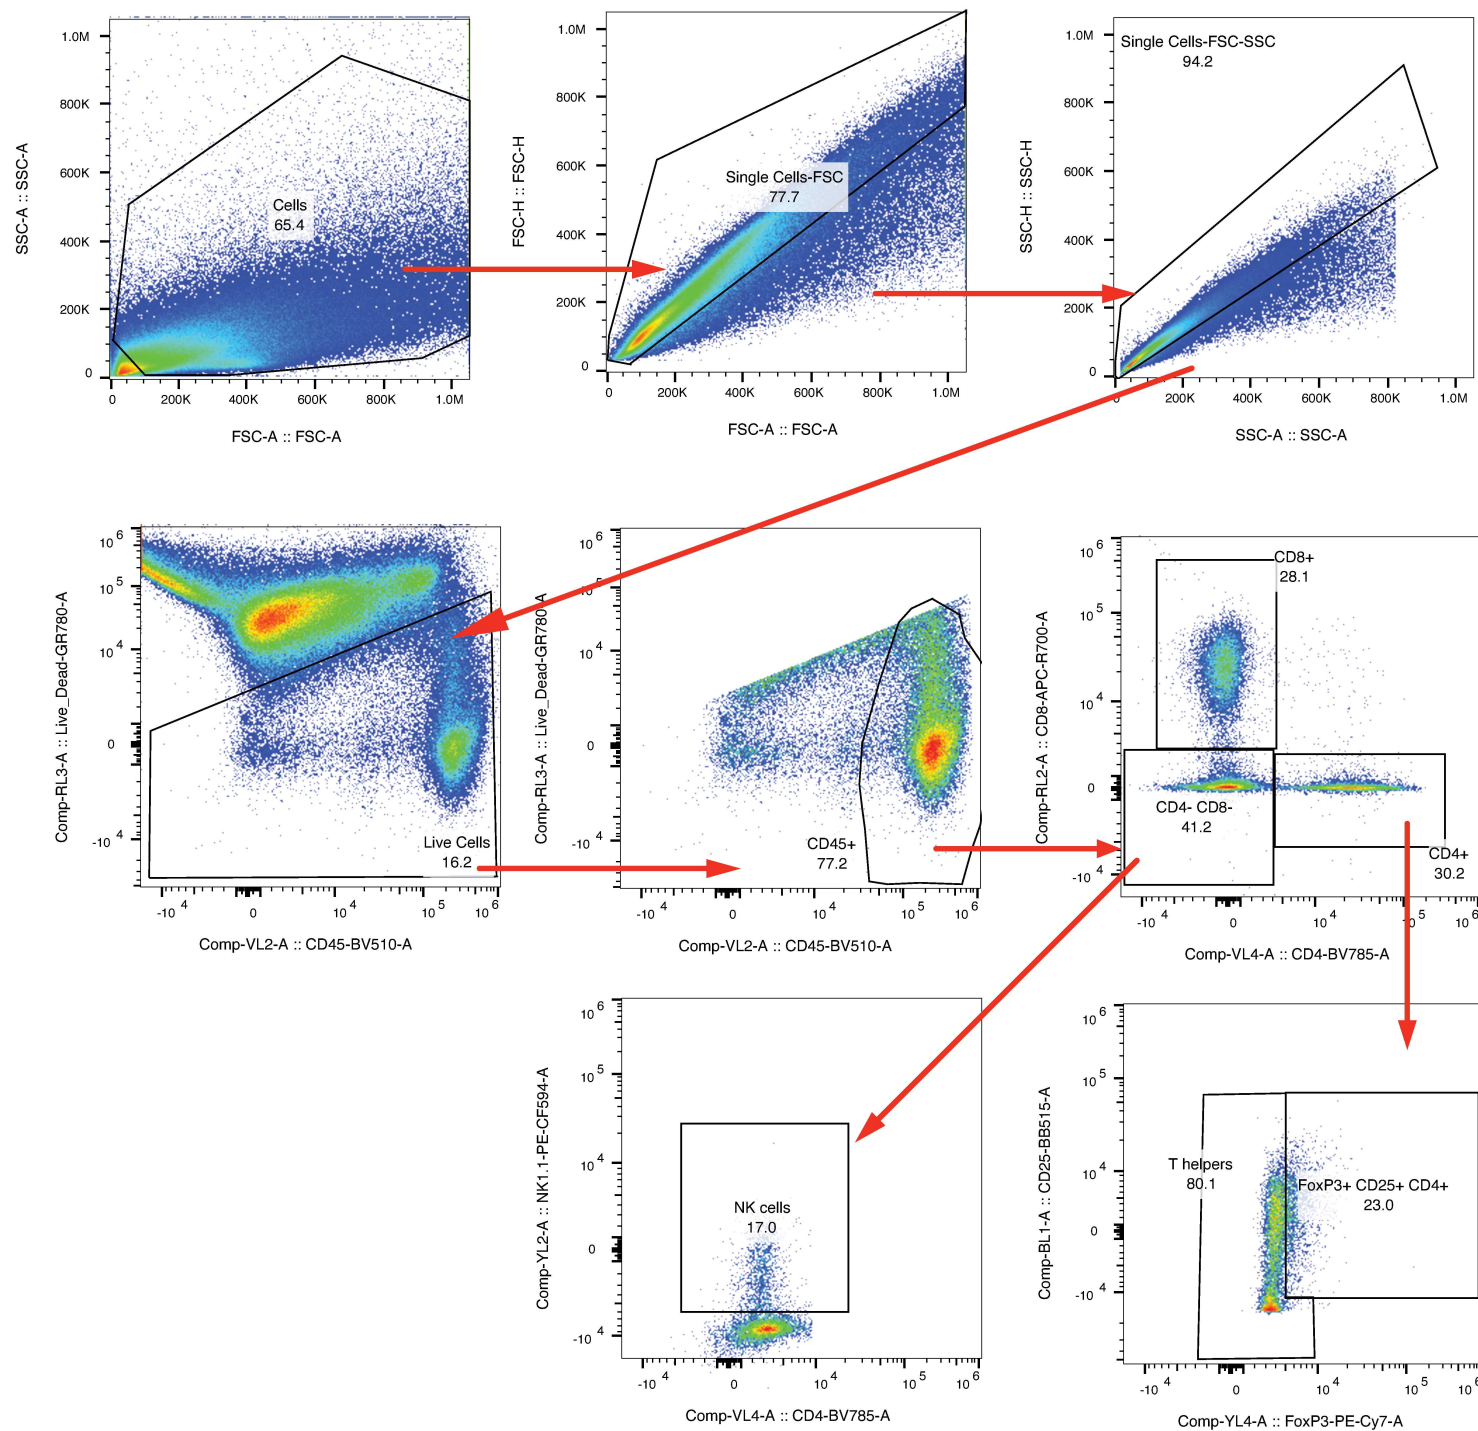

Supplement: jitc-2021-002715supp003_data_supplement.pdf [file jitc-2021-002715supp003_data_supplement.pdf]

## Figure S10: Individual Mouse Curves of RT+BEMPEG+CTLA-4 in B78 Primary B16 Metastasis Model

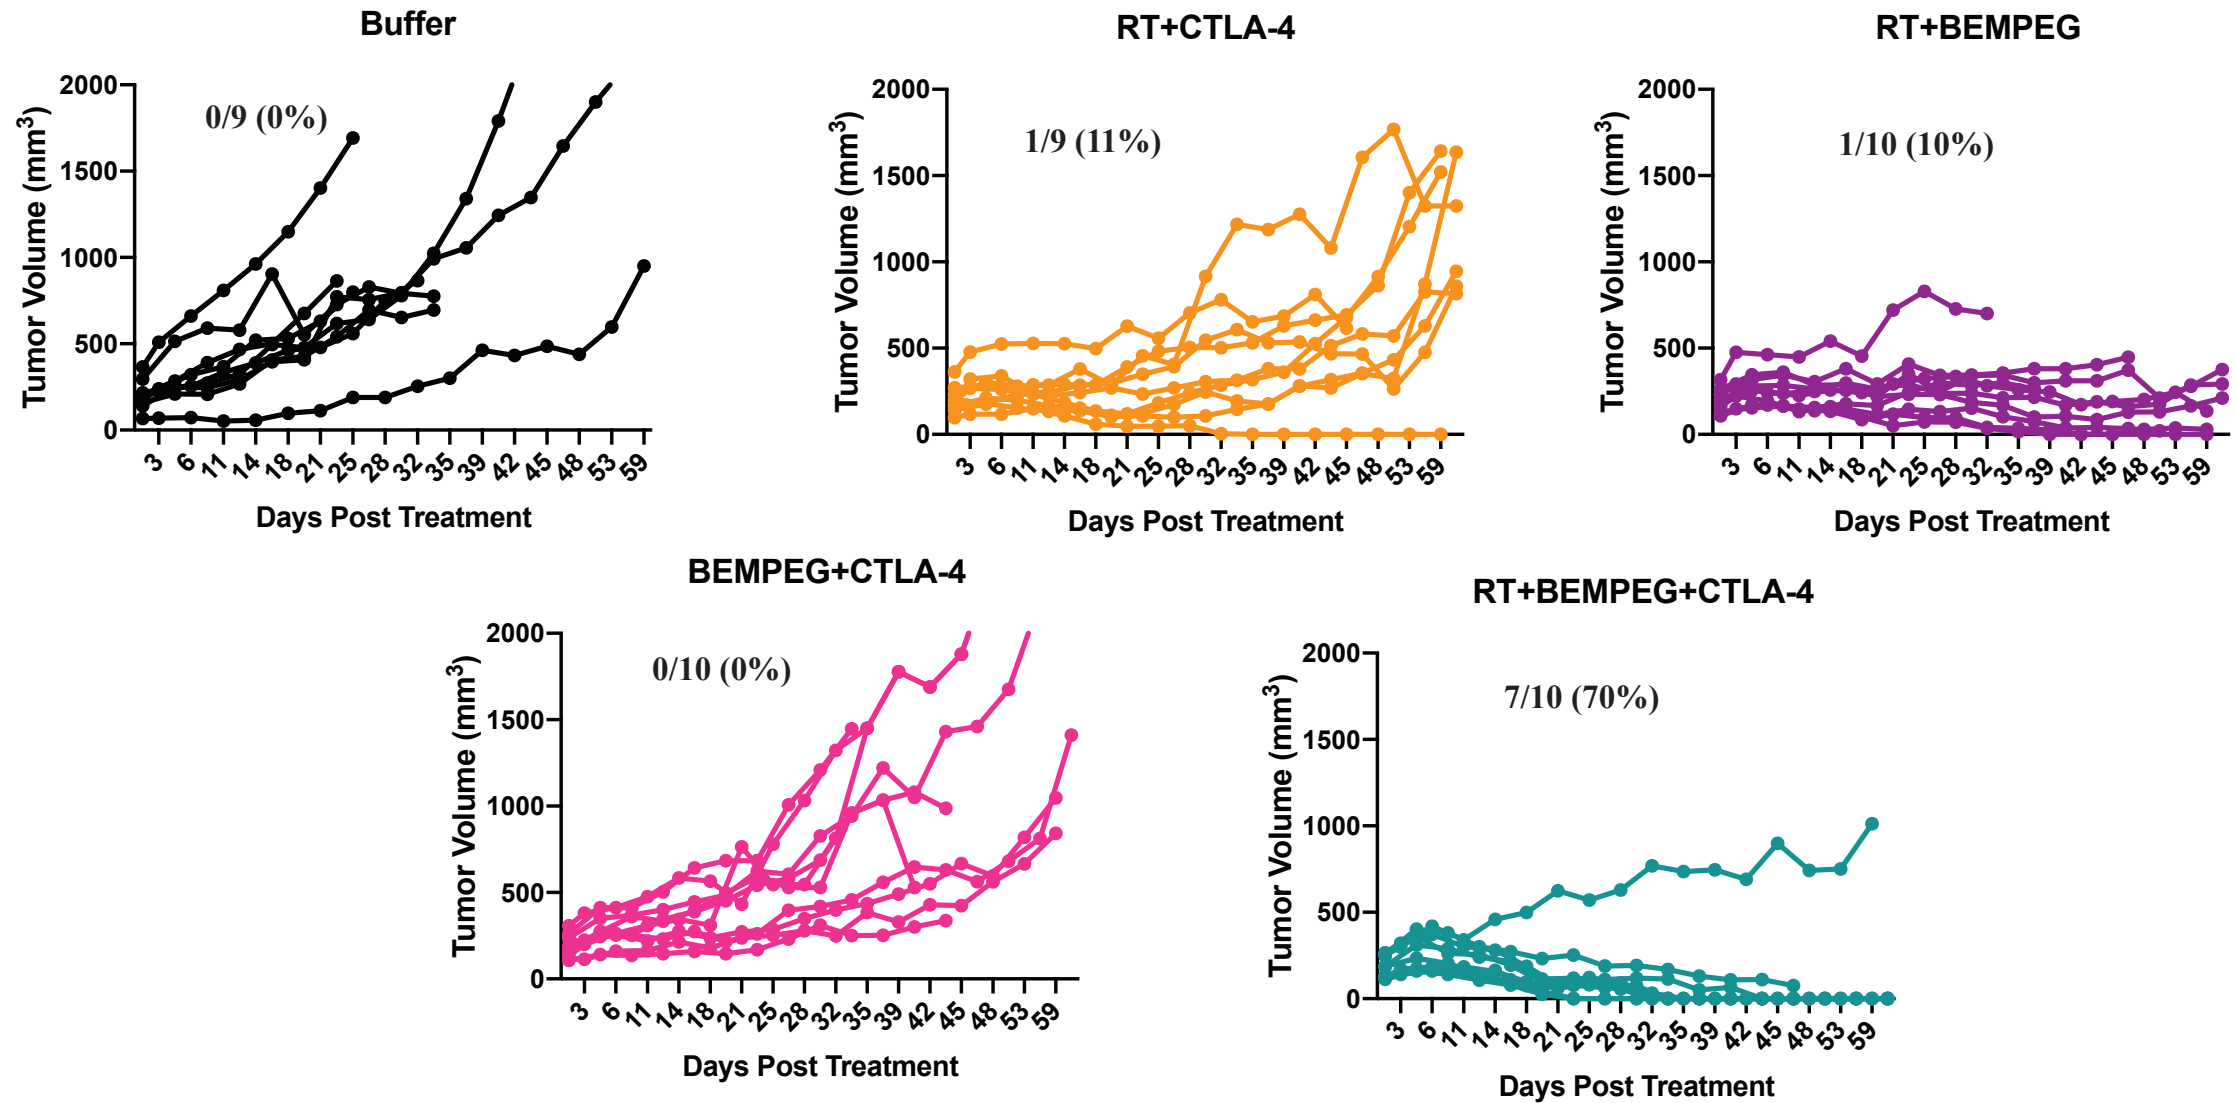

Supplement: jitc-2021-002715supp010_data_supplement.pdf [file jitc-2021-002715supp010_data_supplement.pdf]
