# Supplementary figures and images for: Combination of radiation therapy, bempegaldesleukin, and checkpoint blockade eradicates advanced solid tumors and metastases in mice
Source: PubMed Central journal article supplement — J Immunother Cancer. 2021 Jun 25;9(6):e002715. doi: 10.1136/jitc-2021-002715 (PMC8237721; doi:10.1136/jitc-2021-002715), 2021-06-25

## Figure S4: Peripheral Blood Analysis Confirming *In Vivo* Immune Cell Depletion

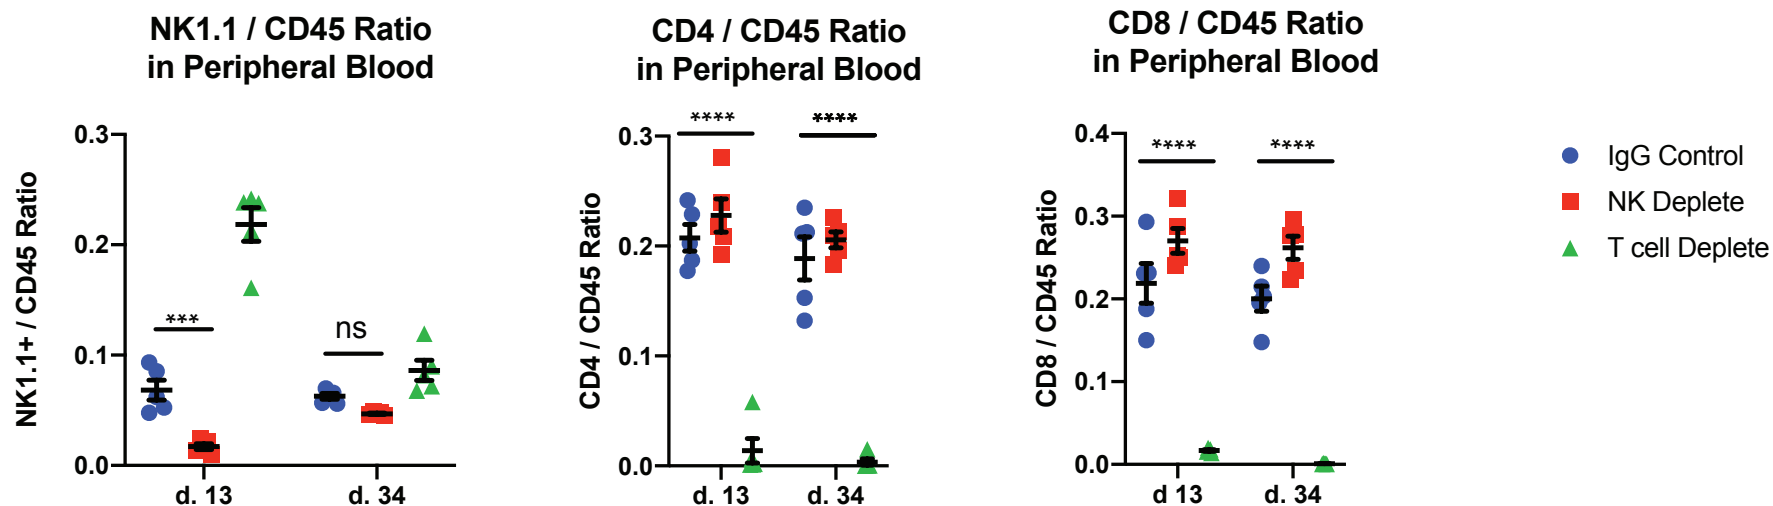

Supplement: jitc-2021-002715supp004.pdf [file jitc-2021-002715supp004.pdf]

# Figure S5: NK Depletion Does Not Impact Long Term Memory Response in B78 Model

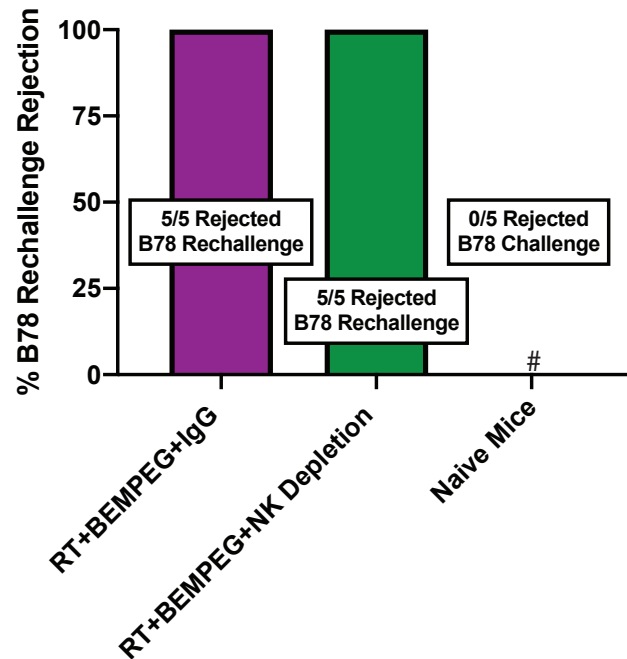

Supplement: jitc-2021-002715supp005.pdf [file jitc-2021-002715supp005.pdf]

# Figure S6: RT+BEMEPG in TCR KO Mice

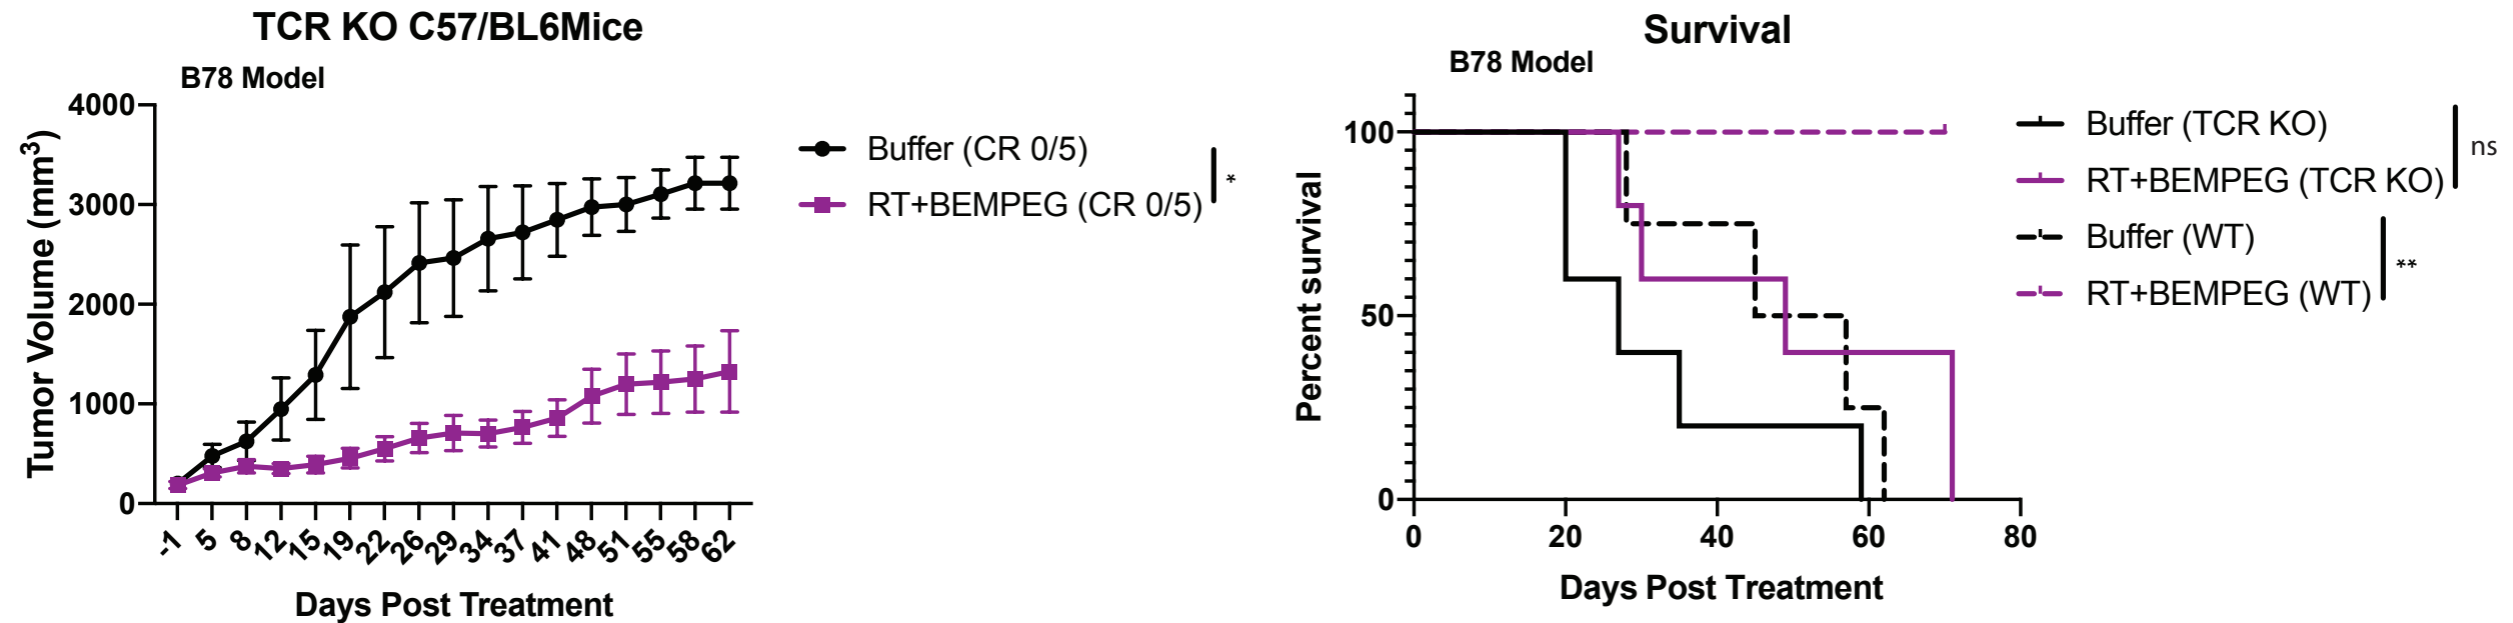

Supplement: jitc-2021-002715supp006.pdf [file jitc-2021-002715supp006.pdf]

# Figure S8: Individual Mouse Curves of RT+BEMPEG+CTLA-4 in 400 mm<sup>3</sup> B78 Tumor Model

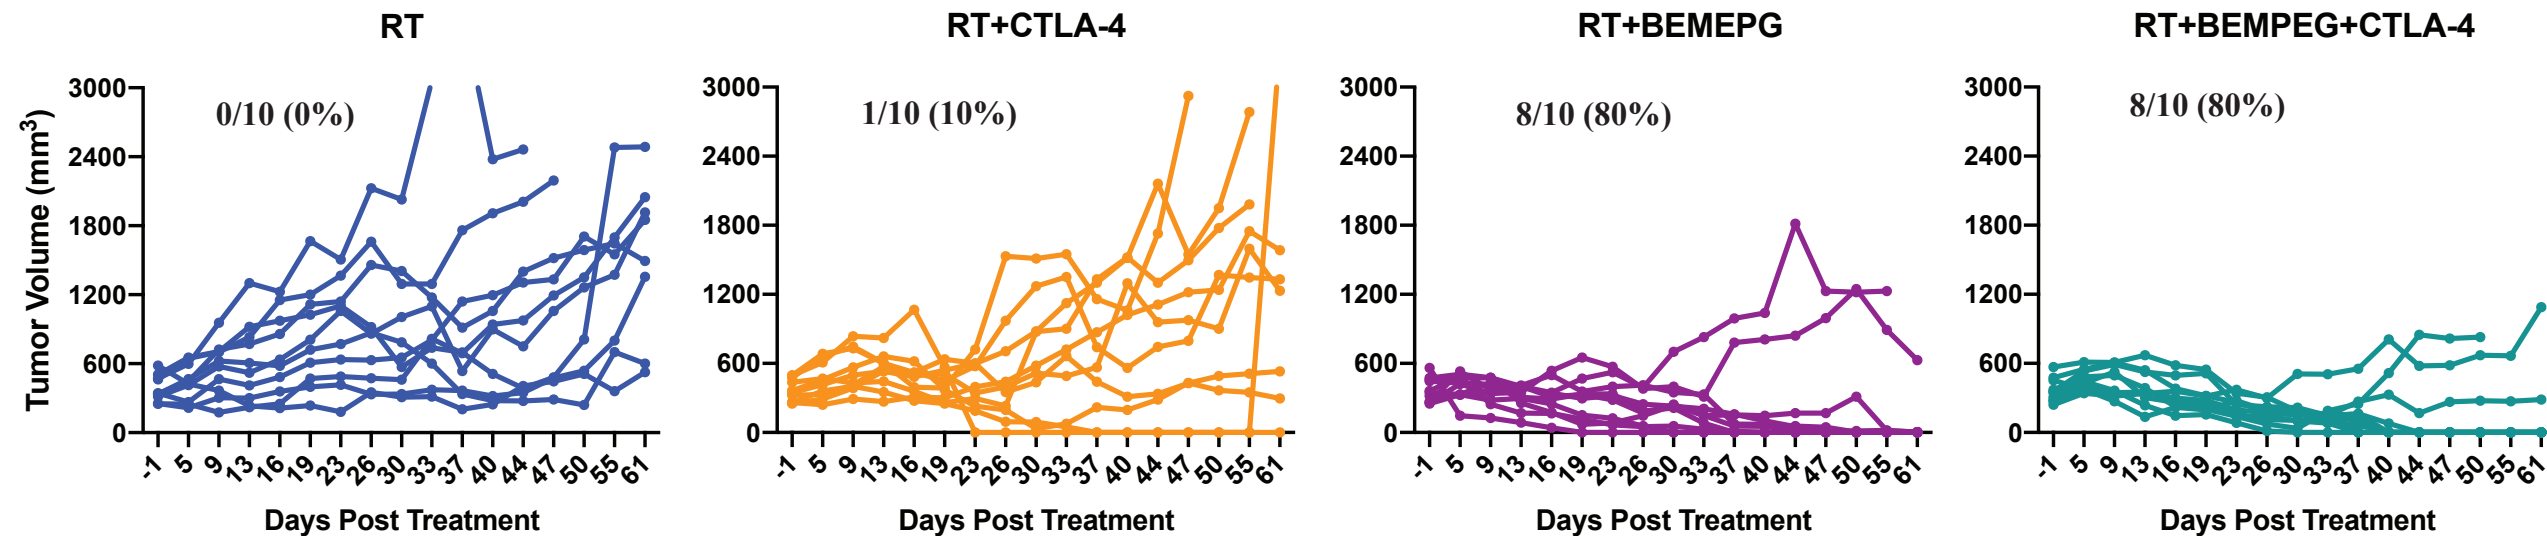

Supplement: jitc-2021-002715supp008.pdf [file jitc-2021-002715supp008.pdf]

# Figure S9: Individual Mouse Curves of RT+BEMPEG+CTLA-4 in 1,000 mm<sup>3</sup> B78 Tumor Model

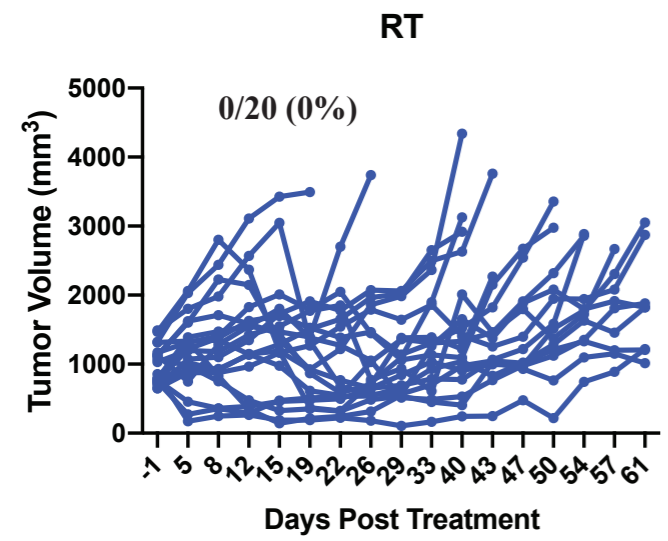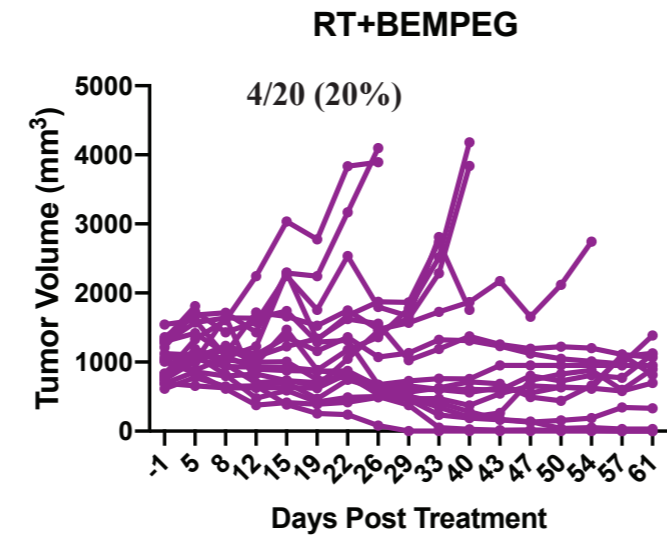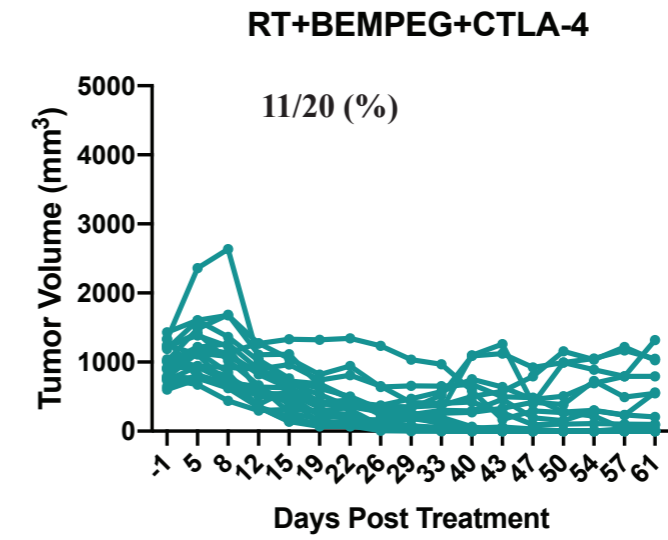

Supplement: jitc-2021-002715supp009.pdf [file jitc-2021-002715supp009.pdf]

## Figure S11: Individual Mouse Curves of RT+BEMPEG+CTLA-4 in 4T1 Model

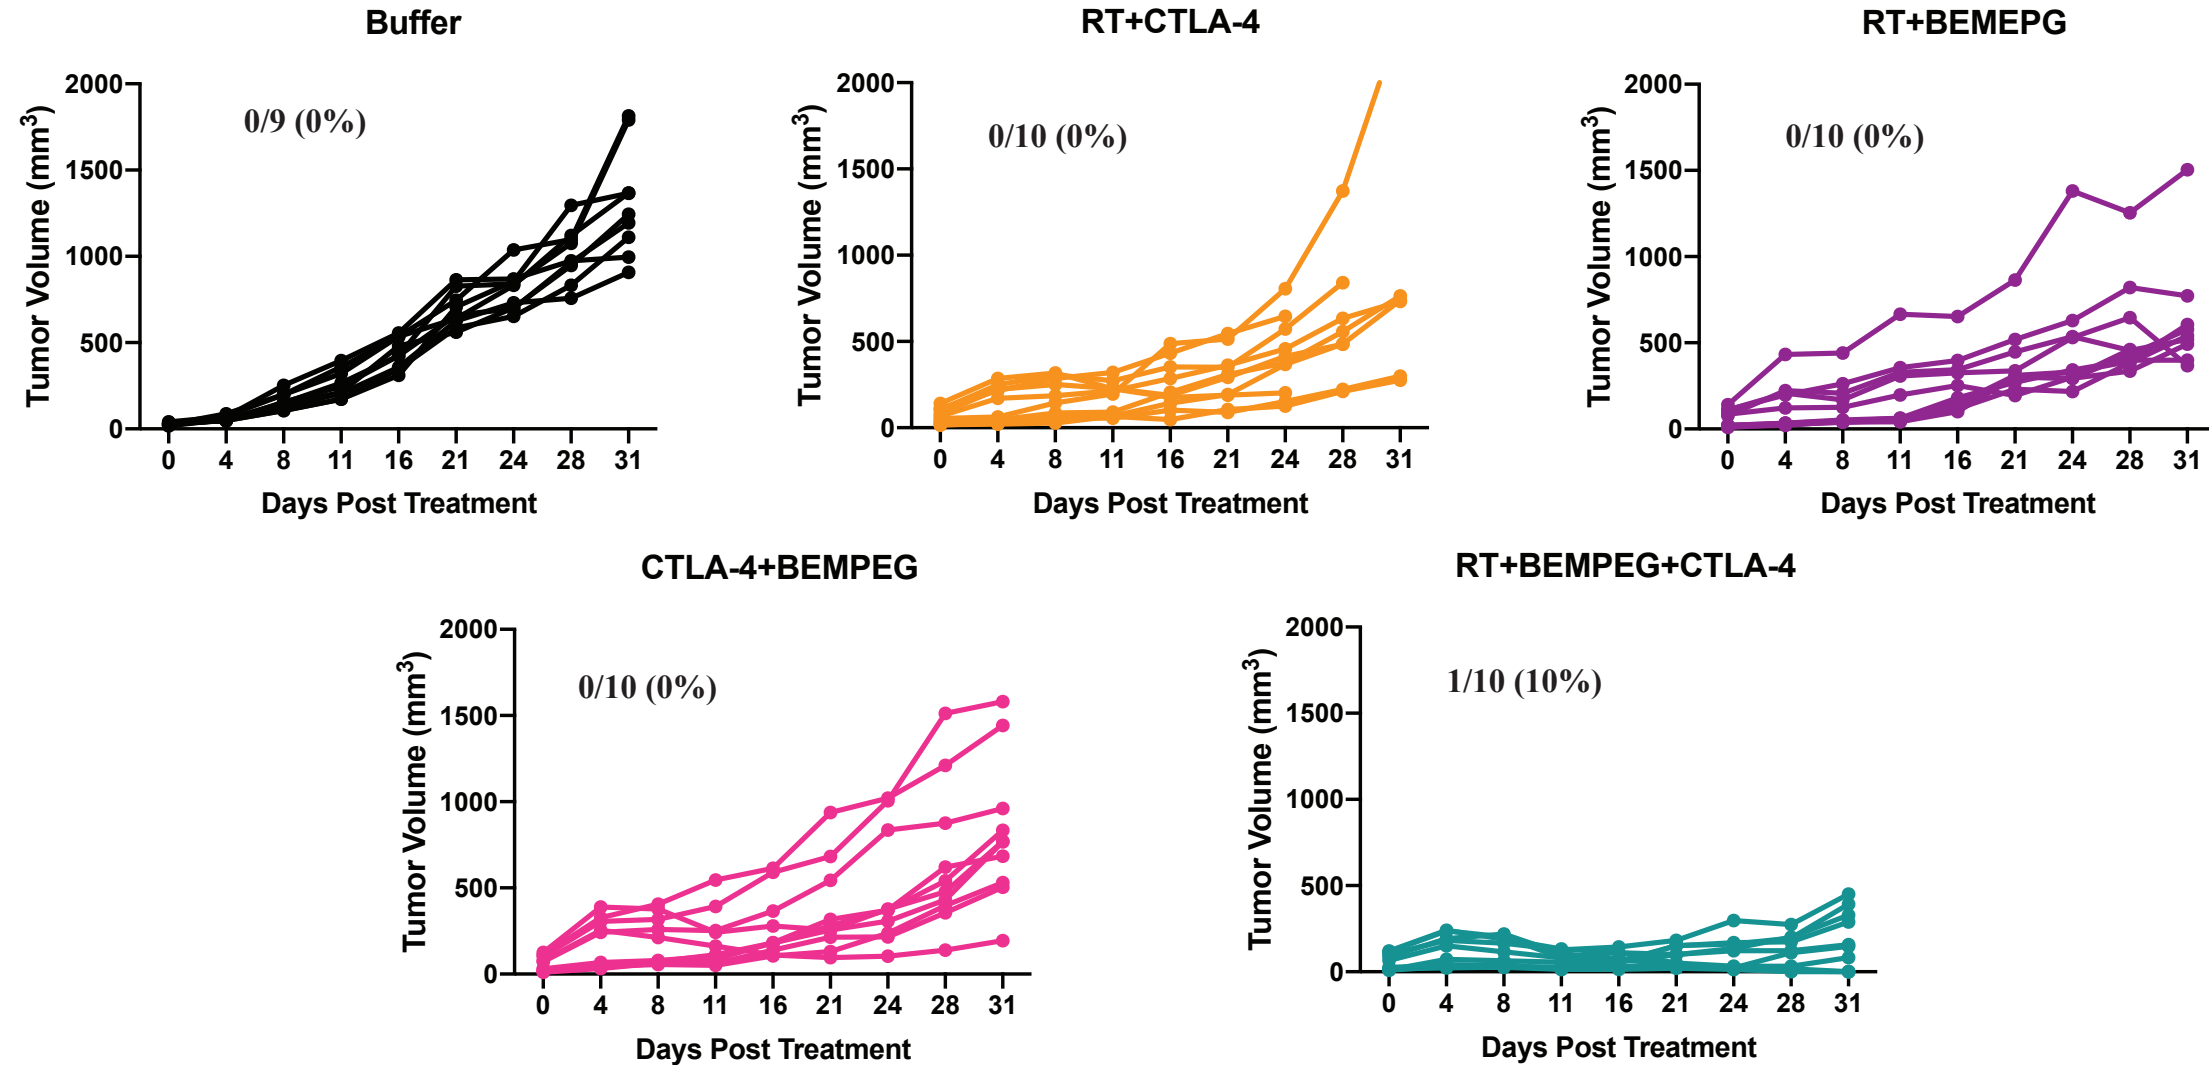

Supplement: jitc-2021-002715supp011.pdf [file jitc-2021-002715supp011.pdf]

## Figure S10: Individual Mouse Curves of RT+BEMPEG+CTLA-4 in B78 Primary B16 Metastasis Model

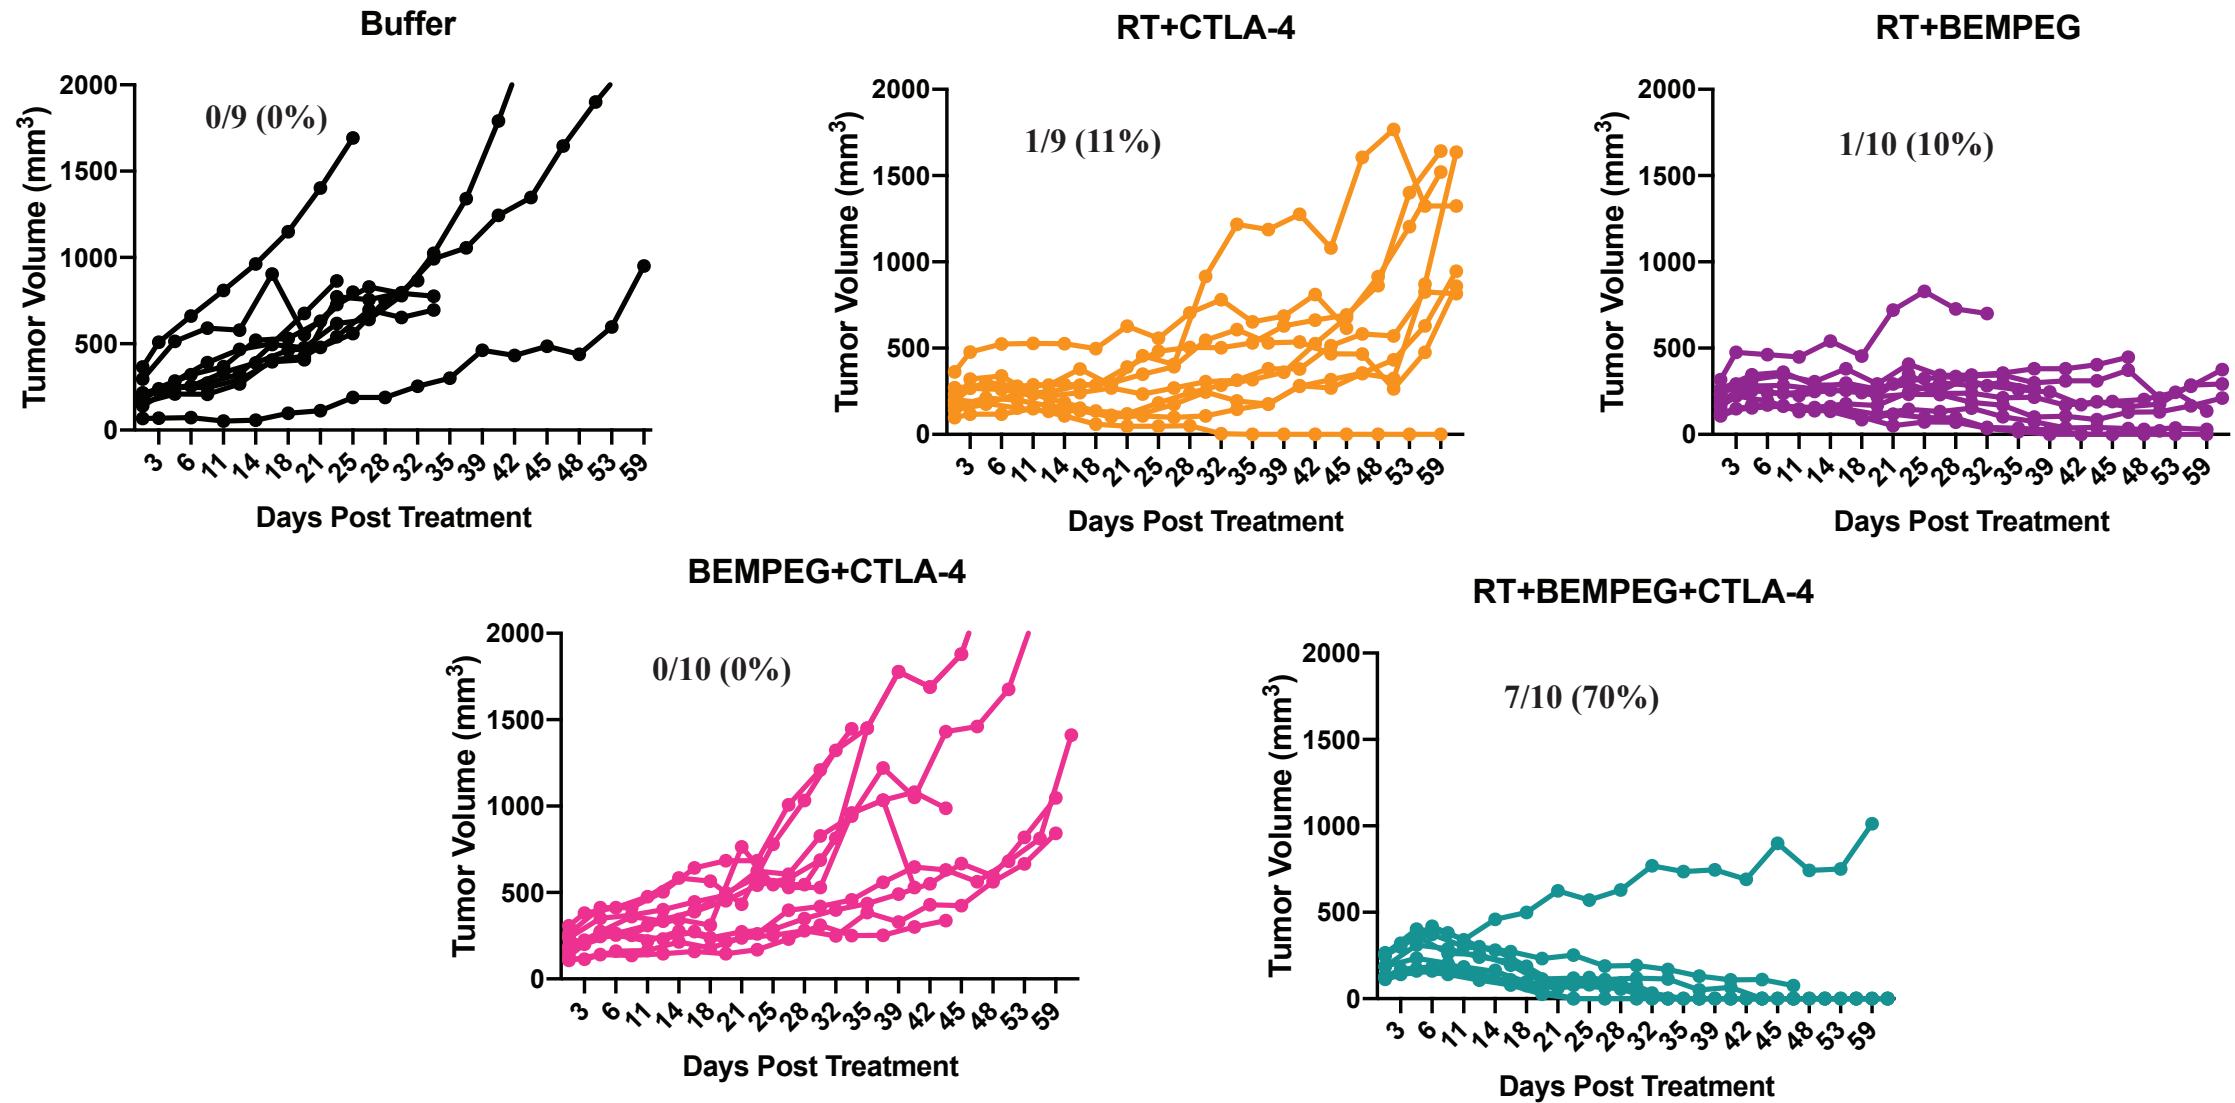

Supplement: jitc-2021-002715supp012.pdf [file jitc-2021-002715supp012.pdf]
